# Supplementary material
Source: PubMed Central journal article supplement (PMC10236501)
Supplement: NIHMS1893817-supplement-Supplemental.pdf [file NIHMS1893817-supplement-Supplemental.pdf]

## Supplementary Information

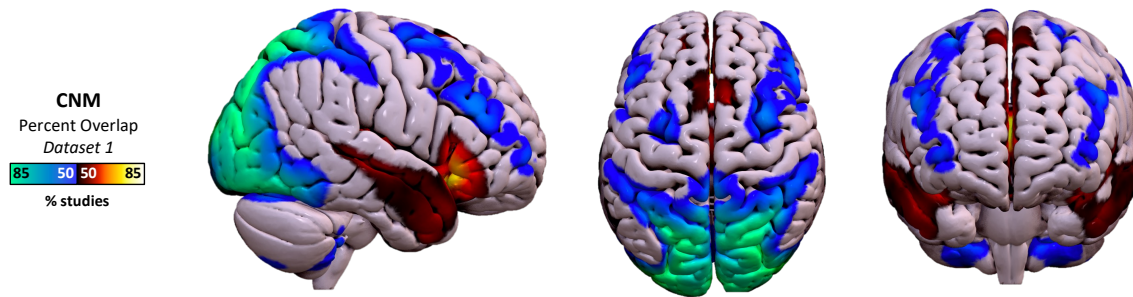

**Supplementary Figure 1.** A surface projection of the transdiagnostic network, thresholded at 50% of studies ( $t=5$ ).

## POSITIVE CONNECTIVITY

| Cluster Size    | Threshold | Min Ext | Coordinates |     |     | Region              |
|-----------------|-----------|---------|-------------|-----|-----|---------------------|
| mm <sup>3</sup> | t>        |         | x           | y   | z   |                     |
| 390             | 12        | 40      | -2          | 22  | 18  | Anterior Cingulate  |
| 358             | 12        | 40      | -30         | 10  | -14 | L Insula            |
| 202             | 12        | 40      | 32          | 12  | -14 | R insula            |
| 83              | 12        | 40      | -6          | -14 | 36  | Posterior Cingulate |
| 41              | 12        | 40      | -20         | 40  | 24  | L frontal pole      |

## NEGATIVE CONNECTIVITY

| Cluster Size    | Threshold | Min Ext | Coordinates |     |     | Region                                         |
|-----------------|-----------|---------|-------------|-----|-----|------------------------------------------------|
| mm <sup>3</sup> | t>        |         | x           | y   | z   |                                                |
| 1149            | 12        | 40      | 58          | -58 | -24 | R inferior temporal gyrus                      |
| 843             | 12        | 40      | 18          | -68 | 68  | R lateral occipital cortex (superior division) |
| 698             | 12        | 40      | -18         | -72 | 64  | L lateral occipital cortex (superior division) |
| 119             | 12        | 40      | 0           | -48 | -68 | Brainstem                                      |
| 49              | 12        | 40      | 2           | -78 | -44 | Cerebellum                                     |

**Supplementary Table 1.** Significant clusters of a composite t-map network map generated from study-level functional connectivity maps using a voxel-wise one-sample t-test, with Bonferroni correction.

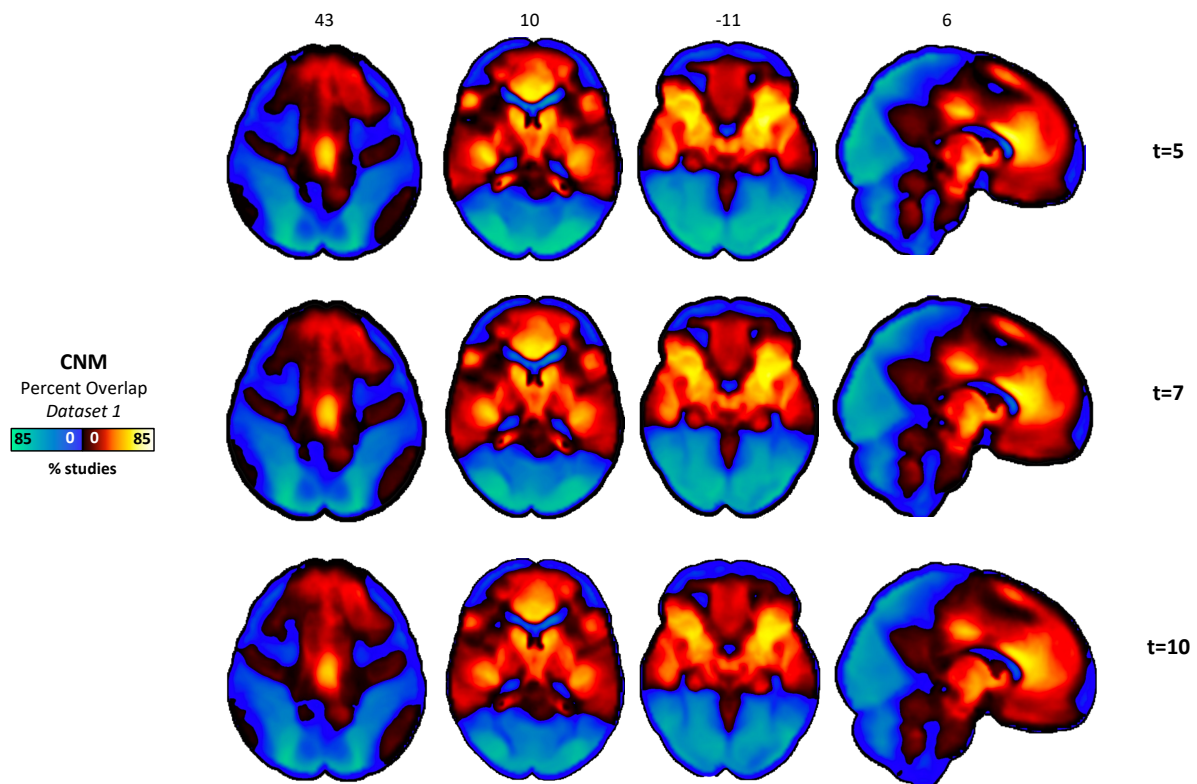

**Supplementary Figure 2.** The topography of the transdiagnostic network is robust across statistical thresholds.

**A**

| Spatial Correlation with Full Map |           |       |
|-----------------------------------|-----------|-------|
| Diagnosis Removed                 | CNM (+/-) | ALE   |
| MDD                               | 0.992     | 0.441 |
| SUD                               | 0.997     | 0.44  |
| BPAD                              | 0.997     | 0.437 |
| SCZ                               | 0.980     | 0.344 |
| PANIC                             | 0.998     | 0.453 |
| OCD                               | 0.995     | 0.448 |
| PTSD                              | 0.997     | 0.453 |

CNM (+/-) vs. ALE

7.47564E-14

**B**

| Spatial Correlation with Full Map |         |       |
|-----------------------------------|---------|-------|
| Diagnosis Removed                 | CNM (+) | ALE   |
| MDD                               | 0.995   | 0.441 |
| SUD                               | 0.998   | 0.44  |
| BPAD                              | 0.997   | 0.437 |
| SCZ                               | 0.989   | 0.344 |
| PANIC                             | 0.998   | 0.453 |
| OCD                               | 0.997   | 0.448 |
| PTSD                              | 0.998   | 0.453 |

CNM (+) vs. ALE

6.31186E-14

**Supplementary Table 2.** The transdiagnostic network from coordinate network mapping was significantly more robust to leave-one-diagnosis-out analyses than the ALE map. (A) Analyses on the coordinate network map with positive and negative connectivity. (B) Analyses on the coordinate network map with only positive connectivity.

**A**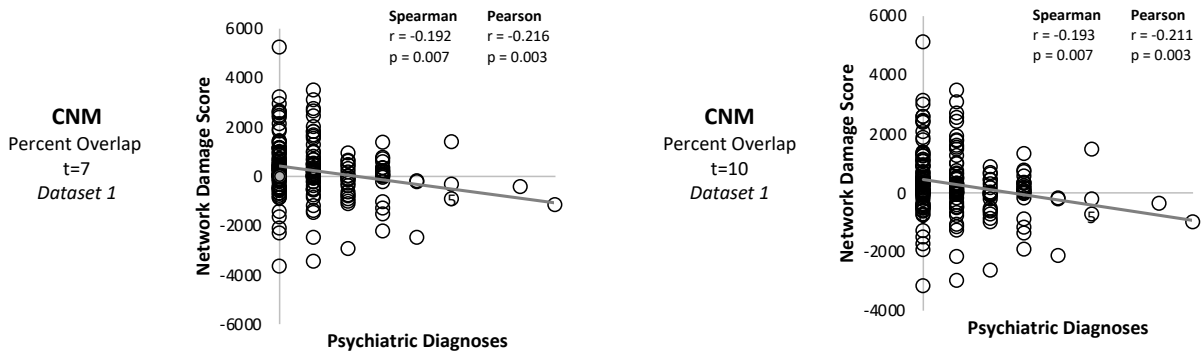**B**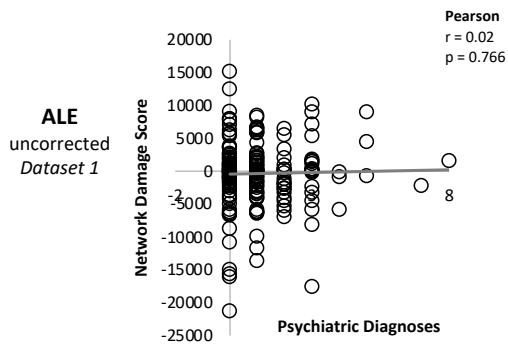

**Supplementary Figure 3.** (A) Lesions with positive network damage scores on the transdiagnostic map were correlated with lower psychiatric comorbidity. By contrast, lesions with negative network damage scores on the transdiagnostic map were correlated with higher psychiatric comorbidity. These results were significant at various statistical thresholds (t=7, Pearson  $r=-0.216$ ,  $p=0.003$ ; t=10, Pearson  $r=-0.211$ ,  $p=0.003$ ). (B) Lesion damage to the unthresholded ALE map was not correlated with psychiatric comorbidity (Pearson  $r=0.02$ ,  $p=0.766$ ).

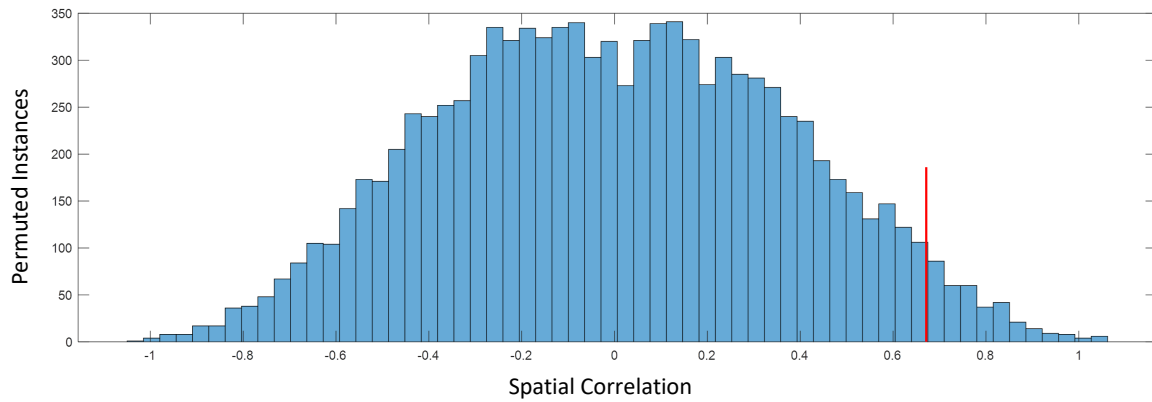

**Supplementary Figure 4.** Histogram showing the spatial correlation of each randomly permuted lesion network to the transdiagnostic network. The spatial correlation of the real lesion network to the transdiagnostic network was  $r = 0.65$ .

| <b>Yeo Network</b> | <b>CNM</b> | <b>LNМ</b> |
|--------------------|------------|------------|
| Visual             | 0.48       | 0.38       |
| Dorsal Attention   | 0.32       | 0.37       |
| Frontoparietal     | 0.06       | 0.11       |
| Limbic             | -0.04      | -0.24      |
| Motor              | -0.07      | -0.18      |
| Ventral attention  | -0.14      | -0.08      |
| Default Mode       | -0.34      | -0.39      |

**Supplementary Table 3.** The transdiagnostic map may have unique elements than vary from canonical networks. No single Yeo network showed a higher spatial correlation to the transdiagnostic network or the lesion network than the two networks showed to each other ( $r=0.65$ ).
